# Supplementary material for: Multi-omics analysis reveals that agaro-oligosaccharides with different degrees of polymerization alleviate colitis in mice by regulating intestinal flora and arginine synthesis
Source: Royal Society of Chemistry journal article supplement (doi:10.1039/d4fo03650f), 2024-01-01
Supplement: d4fo03650f1.pdf [file d4fo03650f1.pdf]

## Supplementary material

**Table S1** Disease activity index (DAI) score standard.

| Score | Wight loss | Stool consistency | Blood stool         |
|-------|------------|-------------------|---------------------|
| 0     | None       | Normal            | None                |
| 1     | 1%~5%      | Soft stool        | Slight occult blood |
| 2     | 5%~10%     | Paste stool       | Occult blood        |
| 3     | 10%~15%    | Loose stool       | Bleeding            |
| 4     | >15%       | Diarrhea          | Gross bleeding      |

**Table S2** The standard for evaluation of histological assessment index (HA score).

| Score | Inflammation | Extent of injury       | Crypt damage                                                      | Percentage of tissue involved |
|-------|--------------|------------------------|-------------------------------------------------------------------|-------------------------------|
| 0     | None         | None                   | None                                                              |                               |
| 1     | Slight       | Mucosal                | Basal 1/3 damaged<br>(the number of goblet cell decrease)         | 1%-25%                        |
| 2     | Severe       | Mucosal and submucosal | Basal 2/3 damaged<br>(A large number of goblet cells disappeared) | 26%-50%                       |
| 3     | Severe       | Transmural             | Only the surficial epithelium is intact                           | 51%-75%                       |
| 4     | Severe       | Chorion layer          | The entire crypt and epithelium lost                              | 76%-100%                      |

**Table S3:** List of antibodies

| Name of Antibody | Catalog number | Concentration | Company    |
|------------------|----------------|---------------|------------|
| occludin         | GB111401       | IF: 1:500     | Servicebio |
| Muc2             | GB111344       | IF: 1:500     | Servicebio |
| ZO-1             | GB111402       | IF: 1:500     | Servicebio |

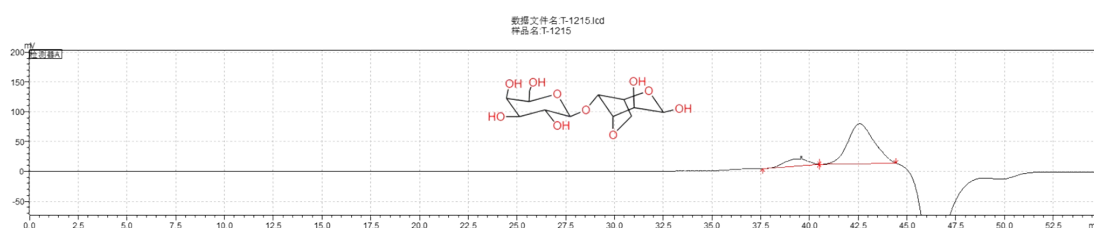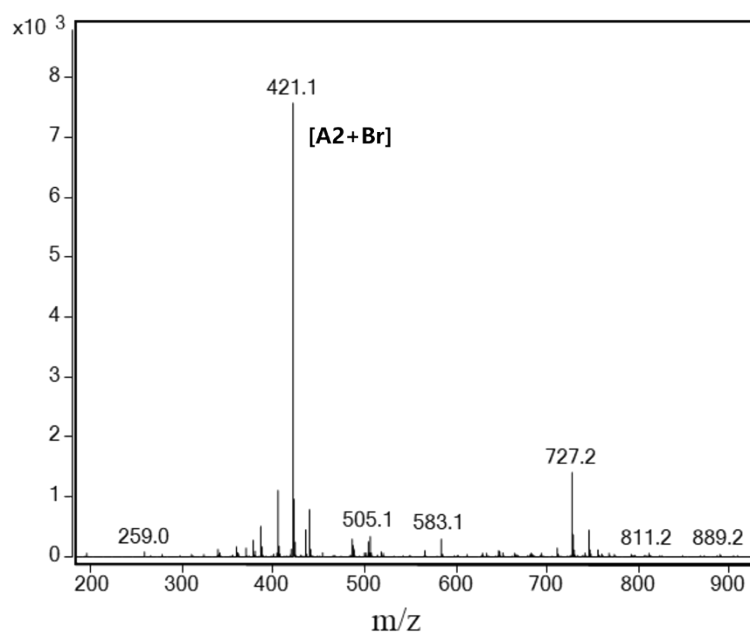

**Fig. S1** A2 purity detected by HPLC-RID and mass spectrometry. The retention time of A2 was 42.574 min, detected by Superdex™ 30 increase. After comparing with the standard product, the purity of the A2 was > 85%.

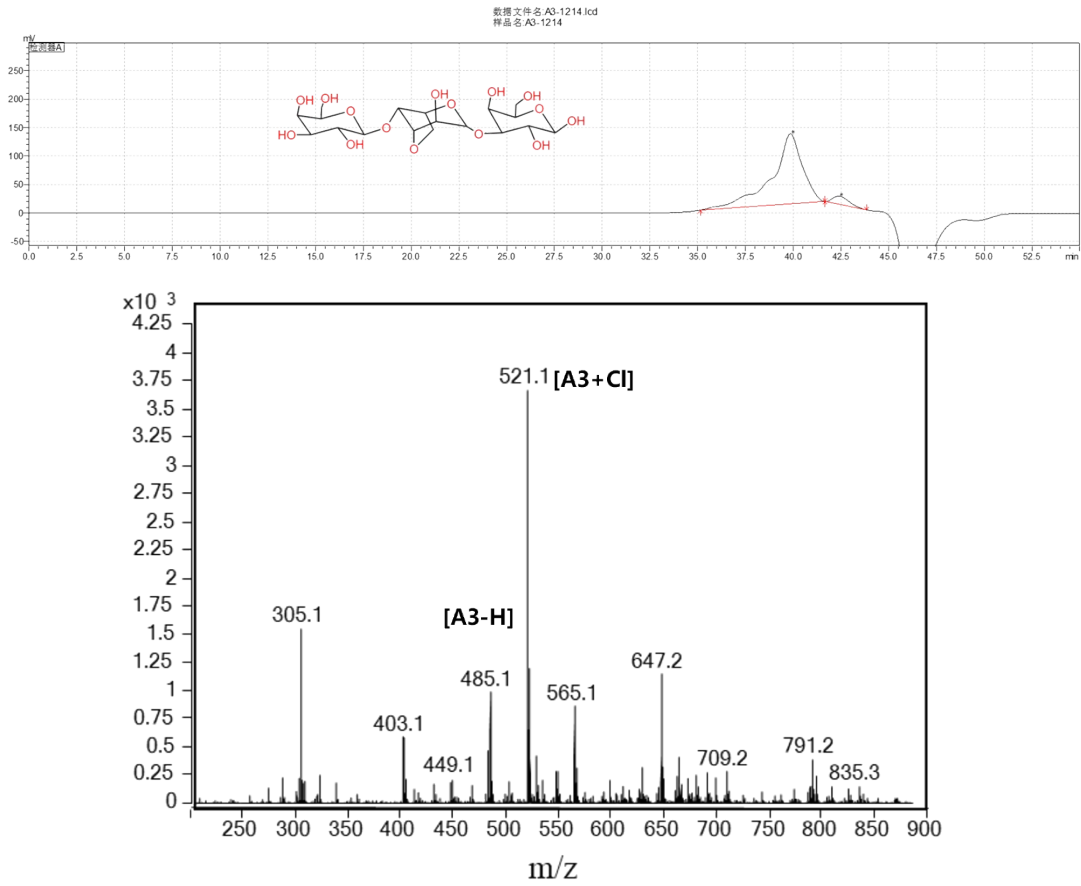

**Fig. S2** A3 purity detected by HPLC-RID and mass spectrometry. The retention time of A3 was 39.854 min, detected by Superdex™ 30 increase. After comparing with the standard product, the purity of the A3 was > 85%.

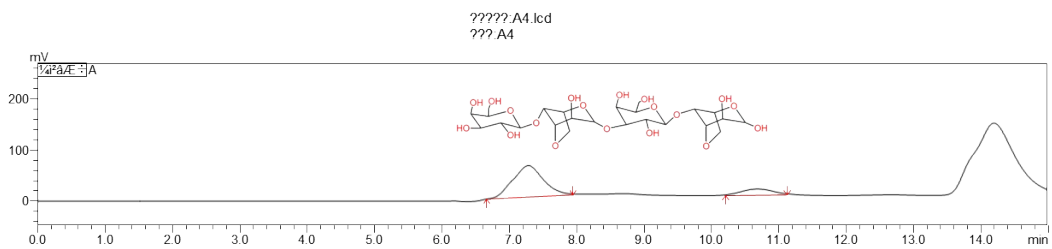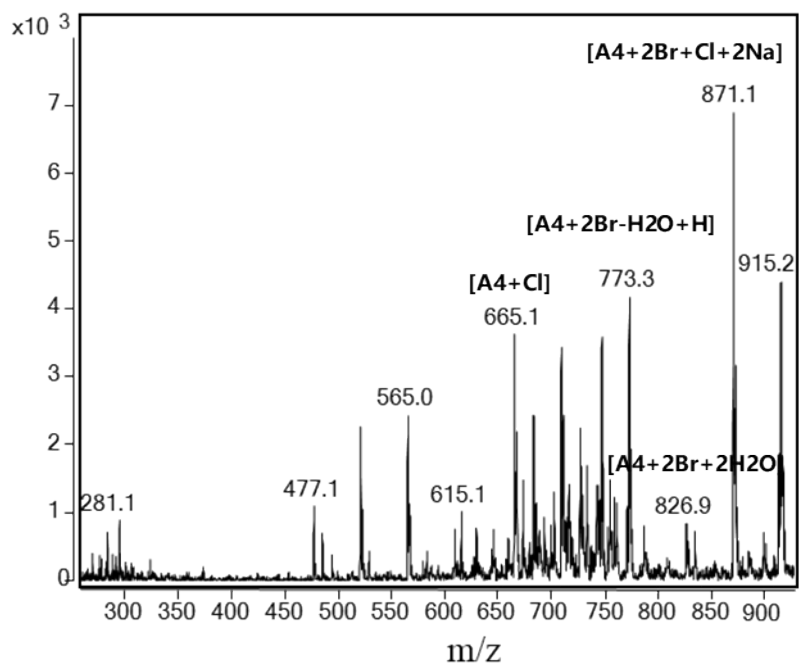

**Fig. S3** A4 purity detected by HPLC-RID and mass spectrometry. the retention time of A4 was 7.311 min, detected by Sugar pak I. After comparing with the standard product, the purity of the A4 was  $> 85\%$ .

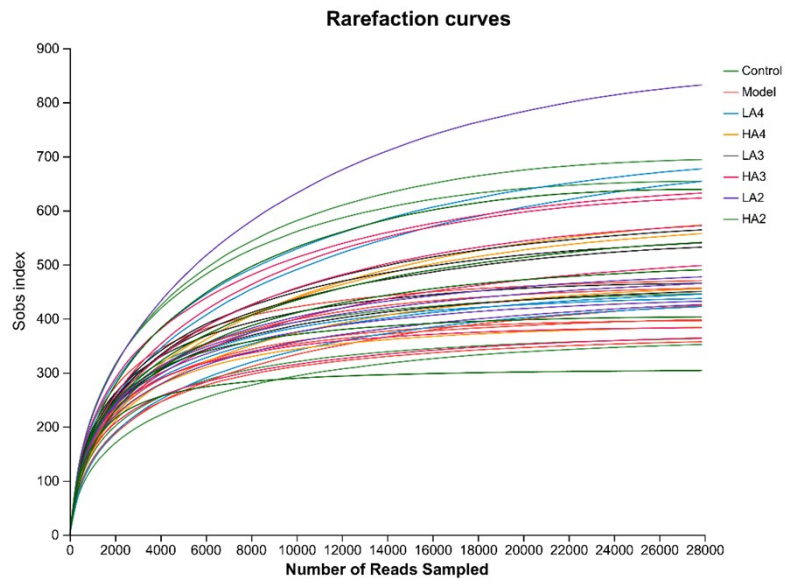

**Fig. S4** Dilution curve of the sample's intestinal flora. When the end tends to be flat, it means that the sample size of the measurement is adequate.

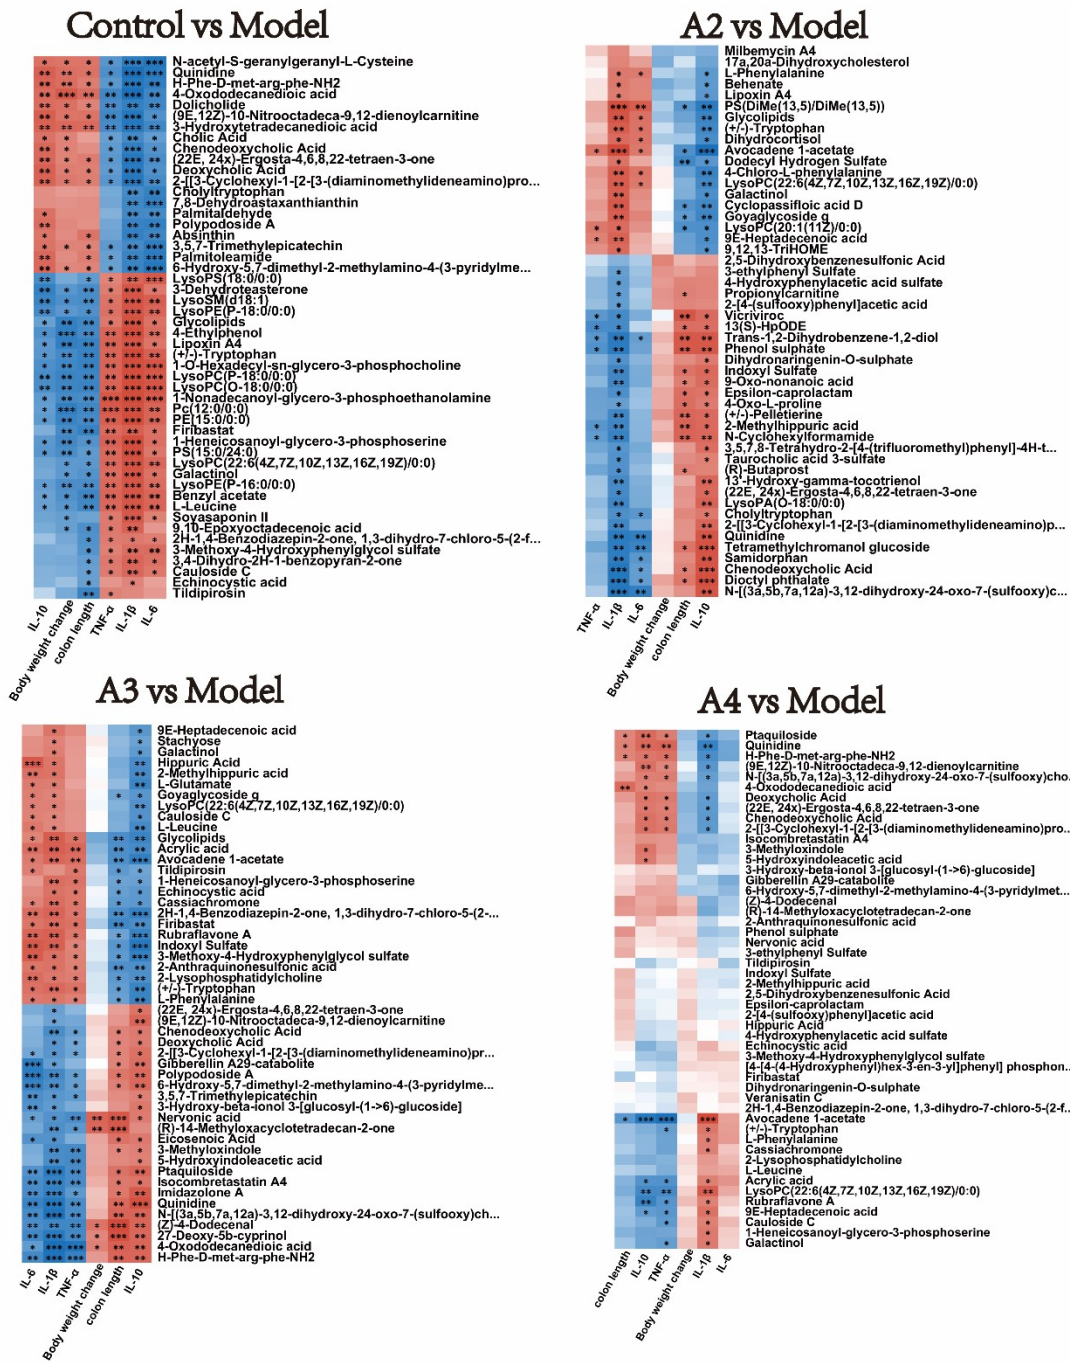

**Fig. S5** heatmap of the Spearman correlation coefficients between the top 50 distinct metabolites and colitis-related parameters.
